# Supplementary material for: Weak Organic Acids Decrease Borrelia burgdorferi Cytoplasmic pH, Eliciting an Acid Stress Response and Impacting RpoN- and RpoS-Dependent Gene Expression
Source: PubMed Central journal article supplement (PMC5626856; doi:10.3389/fmicb.2017.01734), 2017-09-29
Supplement: Image_1.pdf [file Image_1.pdf]

Fig S1.

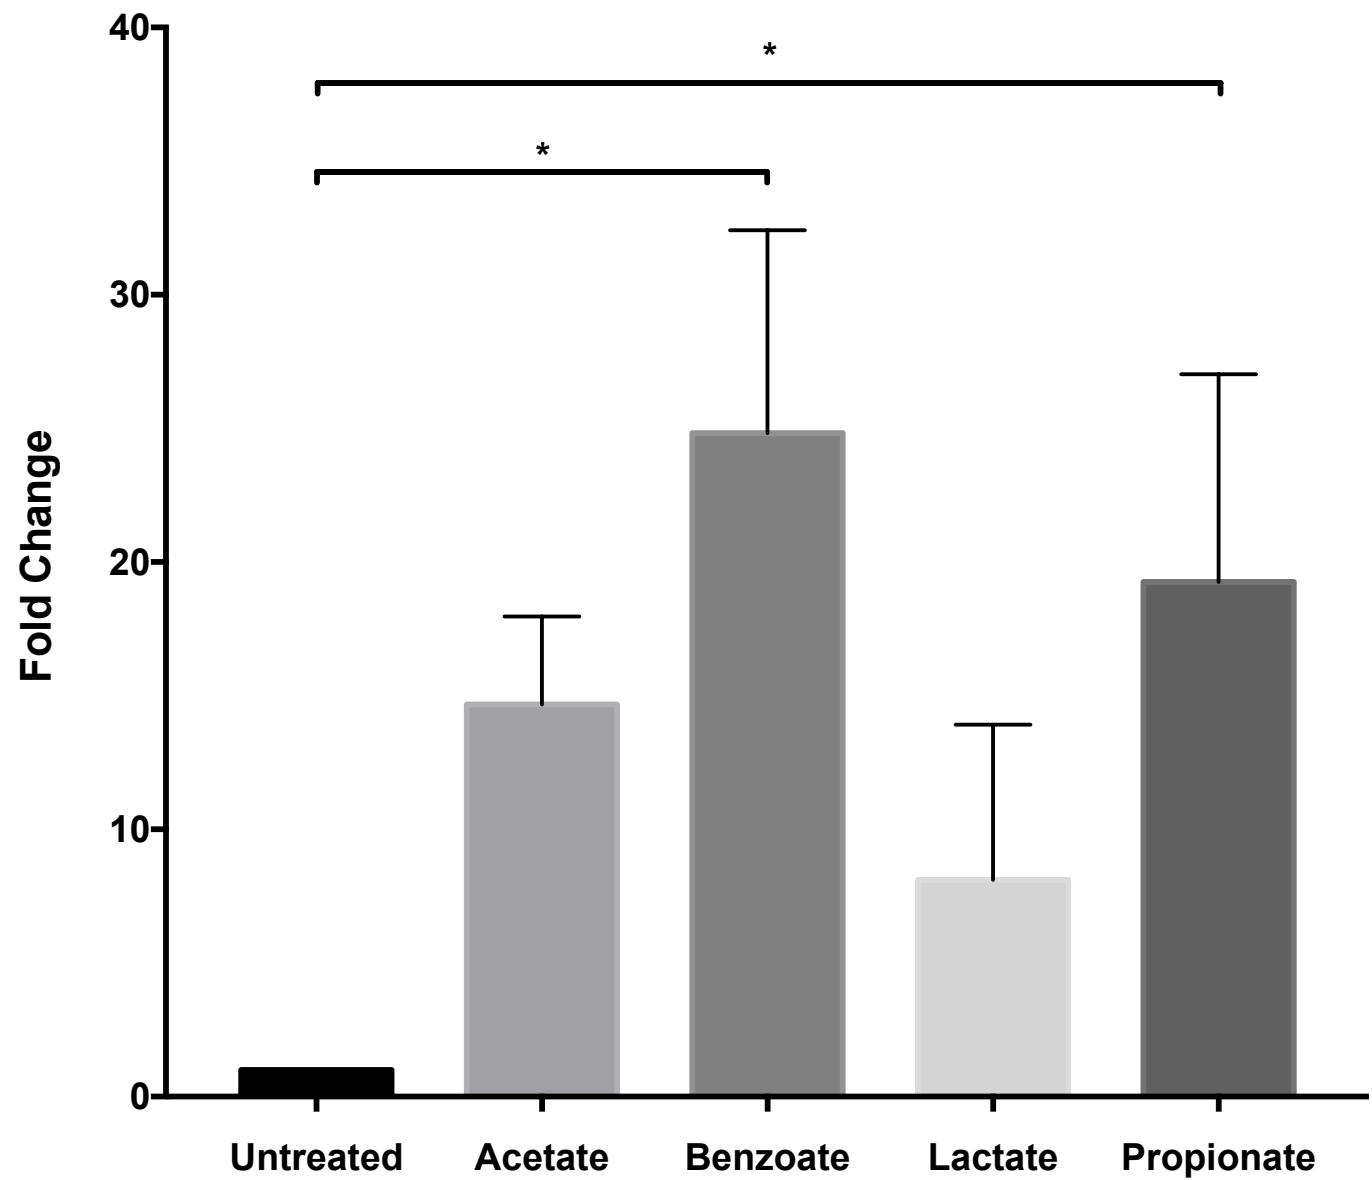

**Fig S2.**

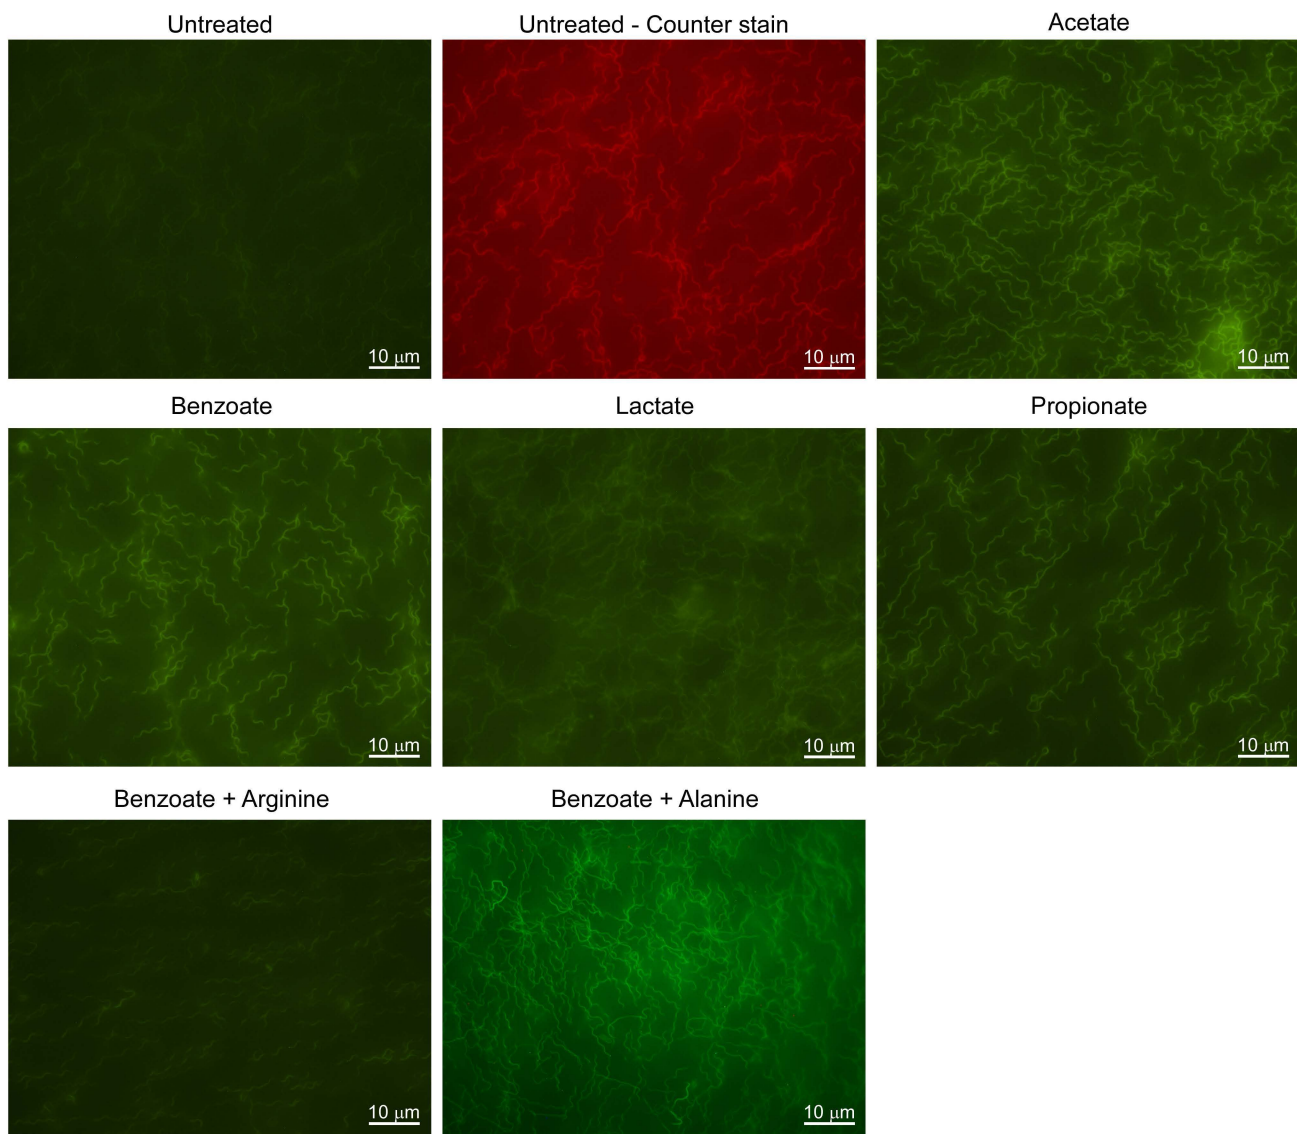

Fig S3.

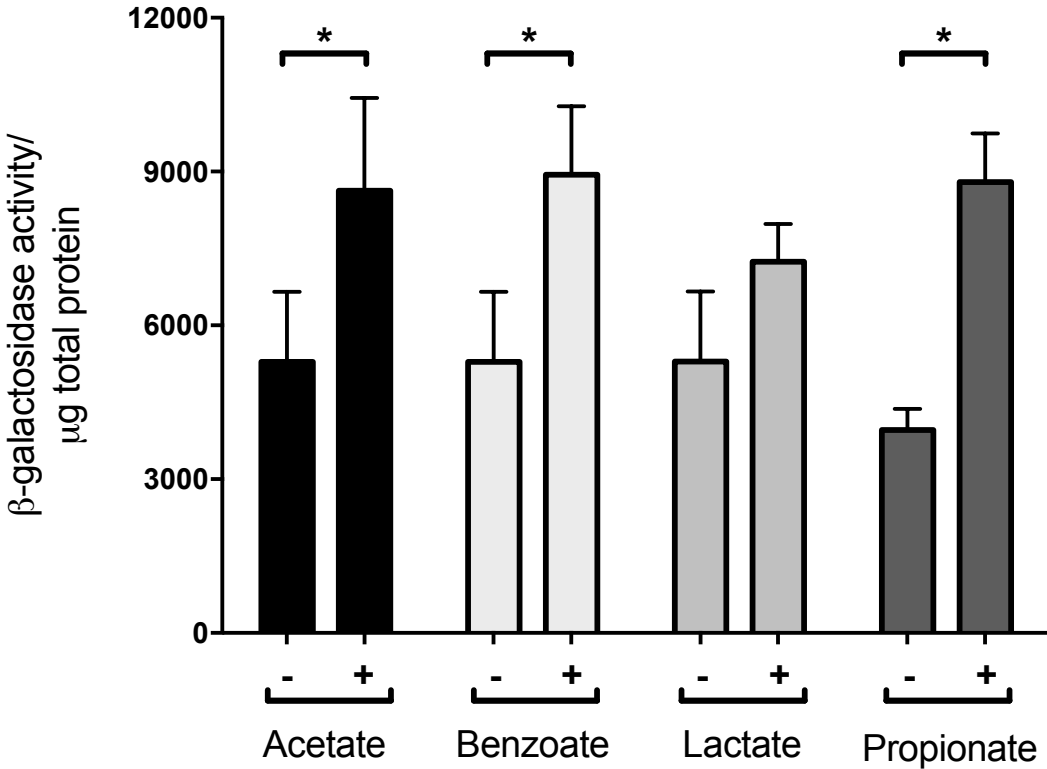

**Fig S1. Relative fold change in OspC and BBA66 levels**

Quantification of immunoblots evaluating the relative fold change of OspC and BBA66 following treatment with acetate, benzoate, lactate or propionate. Immunoblots were quantified using Image J software and a value of “1” was assigned to the untreated control to determine relative fold change. Mean and standard deviation are displayed and asterisks denote a statistically significant difference of the mean determined using a one-way ANOVA where  $p < 0.05$ .

**Fig S2. Fluorescence microscopy of *B. burgdorferi***

Fluorescence microscopy of *B. burgdorferi* strain B31-A3 grown in media alone (Untreated) or in the presence of acetate, benzoate, lactate, propionate, benzoate and arginine or benzoate and alanine and stained with the membrane-permeable pH-sensitive dye pHrodo Green. Spirochetes grown in media alone were also stained with a FITC stain to visualize spirochetes (Untreated – Counter stain).

**Fig S3. Membrane-permeable acids activate transcription of *lacZ* from the *ospC* promoter.**

*B. burgdorferi* strain B31-A3 harboring a shuttle vector containing a *lacZ* reporter construct was grown in the (-) absence or (+) presence of acetate, benzoate, lactate or propionate and  $\beta$ -galactosidase activity in cell lysates was analyzed. Mean and standard deviation are displayed and asterisks denote a statistically significant difference of the mean determined using a one-way ANOVA where  $p < 0.05$ .
